# Supplementary material for: Meta-analysis based gene expression profiling reveals functional genes in ovarian cancer
Source: PubMed Central journal article supplement (PMC7677829; doi:10.1042/bsr20202911), 2020-11-19
Supplement: BSR-2020-2911_supp.pdf [file BSR-2020-2911_supp.pdf]

**A**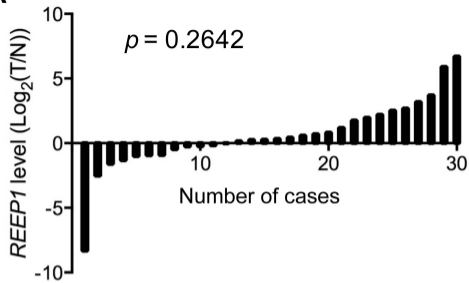**B**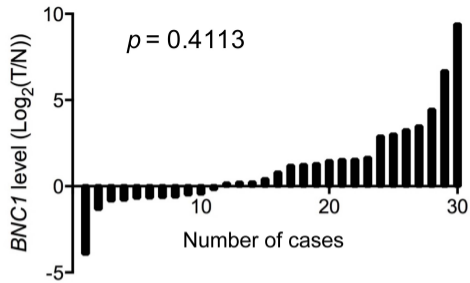**C**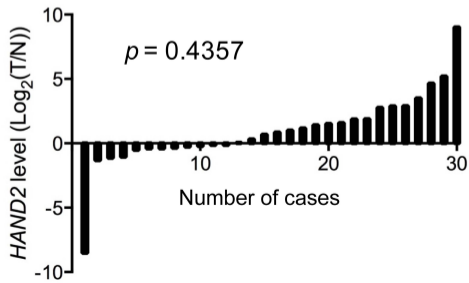**D**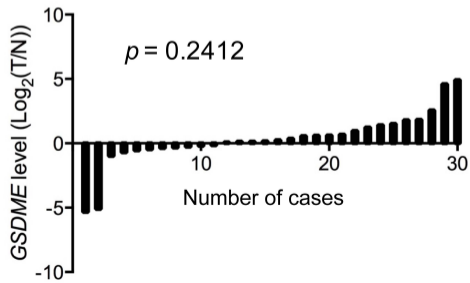

**Supplementary Figure 1. Four Down-regulated genes fail to be validated by extended samples.** Relative gene levels of ovarian cancer and normal tissues measured by qPCR were shown using waterfall plot. **(A-D)** Represent the levels of *REEP1*, *BNC1*, *HAND2*, *GSDME* separately.

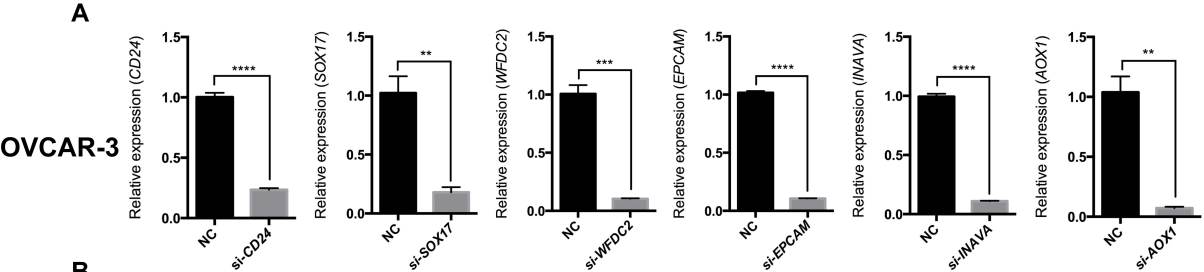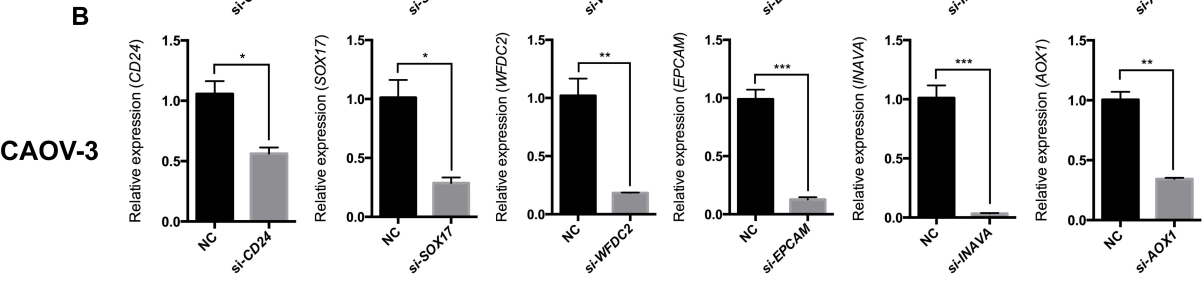

**Supplementary Figure 2. Gene knockdown efficiency. (A-B)** QPCR analysis for the expression of each gene in OVCAR-3 and CAOV-3 cells upon NC, si-*CD24*, si-*SOX17*, si-*WFDC2*, si-*EPCAM*, si-*INAVA* and si-*AOXI* transfection.

**A****OVCAR-3**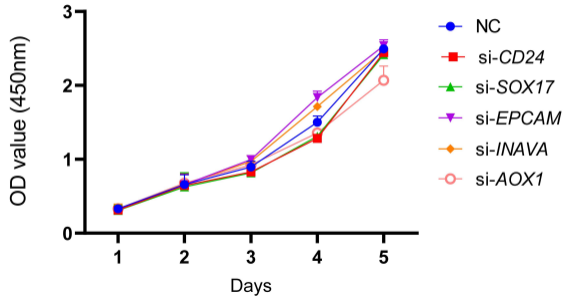**B****CAOV-3**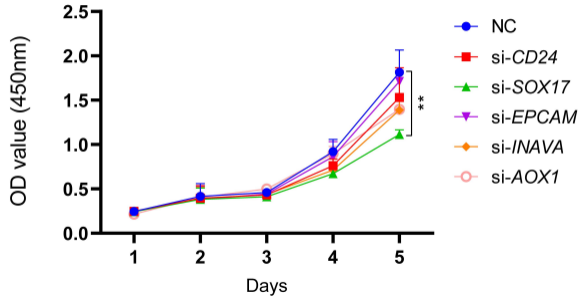

**Supplementary Figure 3. Genes that have no effects on proliferation for ovarian cancer cells. (A-B)** Growth curve of OVCAR-3 and CAOV-3 cells upon transfection with NC and si-*CD24*, si-*SOX17*, si-*EPCAM*, si-*INAVA* and si-*AOX1*. Transfected cells were counted and plated in 96-well plates.

**OVCAR-3**

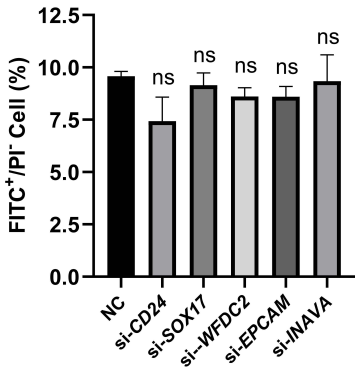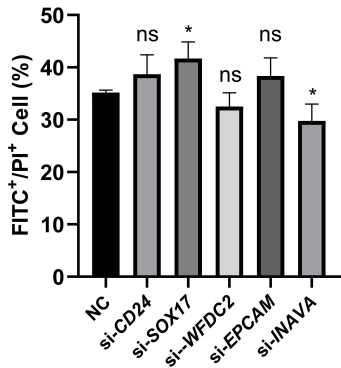

**CAOV-3**

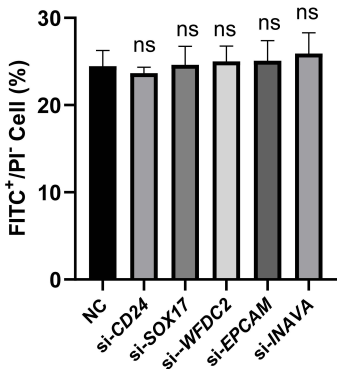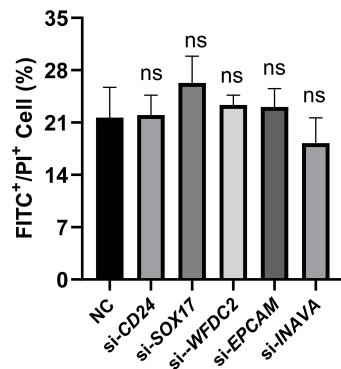

**Supplementary Figure 4. Genes that have no effects on apoptosis for ovarian cancer cells.** NC, si-*CD24*, si-*SOX17*, si-*WFDC2*, si-*EPCAM* and si-*INAVA* were transfected into OVCAR-3 and CAOV-3 cells, cell apoptosis analysis was performed as indicated in methods.



**NC****si-CD24****si-SOX17****si-EPCAM****si-AOX1****OVCAR-3**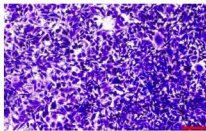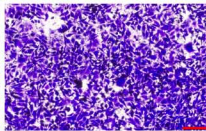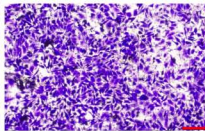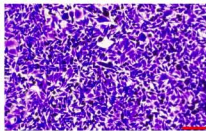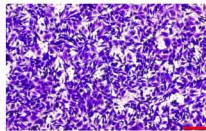**CAOV-3**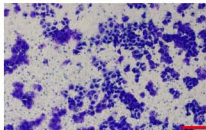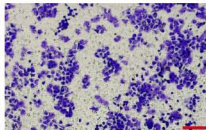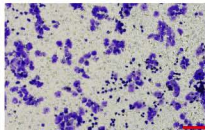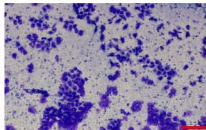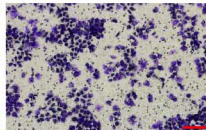

**Supplementary Figure 5. Genes that have no effects on migration for ovarian cancer cells.** Transwell assay analyzed the migration of OVCAR-3 and CAOV-3 upon NC, si-*CD24*, si-*SOX17*, si-*EPCAM*, si-*INAVA* and si-*AOX1* transfection (magnification,  $\times 100$ ). Scale bar= 100  $\mu$  m.

**Supplementary Table1. The clinicopathologic features of ovarian cancer patients.**

| Characteristics |        | Total number |
|-----------------|--------|--------------|
| Age             | < 50   | 12           |
|                 | ≥ 50   | 18           |
| Tumor grades    | I-II   | 11           |
|                 | III    | 19           |
| Tumor stage     | I-II   | 13           |
|                 | III-IV | 17           |

The table lists the age and tumor grade and tumor stage of the 30 ovarian cancer patients used in the study.

**Supplementary Table 2. Oligo sequences used in the experiments.**

| <b>Oligo ID</b>     | <b>Sequence (5'-3')</b>                                          |
|---------------------|------------------------------------------------------------------|
| Negative control    | Sense: UUCUCCGAACGUGUCACGUTT<br>Antisense: ACGUGACACGUUCGGAGAATT |
| <i>CD24</i> -siRNA  | Sense: GCACUAAUUUAAUGCCGAUTT<br>Antisense: AUCGGCAUUAAAUUAGUGCTT |
| <i>SOX17</i> -siRNA | Sense: CACGGAAUUUGAACAGUAUTT<br>Antisense: AUACUGUUCAAAUUCGUGTT  |
| <i>EPCAM</i> -siRNA | Sense: GGAUCAUCAUUGAACUAAATT<br>Antisense: UUUAGUUCAAUGAUGAUCCTT |
| <i>WFDC2</i> -siRNA | Sense: ACCAGAACUGCACGCAAGATT<br>Antisense: UCUUGCGUGCAGUUCUGGUTT |
| <i>INAVA</i> -siRNA | Sense: GCAAGUCUUUGUACCUGAATT<br>Antisense: UUCAGGUACAAAGACUUGCTT |
| <i>AOX1</i> -siRNA  | Sense: GCAGCCAAAUGUGGACUAUTT<br>Antisense: AUAGUCCACAUUUGGCUGCTT |

The sequences of siRNAs used for CD24, SOX17, WFDC2, EPCAM, INAVA, BNC1, AOX1, GSDME, REEP1, and HAND2 knockdown are listed in this table .

**Supplementary Table 3. List of PCR primer sequences used in mRNA expression analysis.**

| Gene  | Species      | Sequence (5'-3')                                                   |
|-------|--------------|--------------------------------------------------------------------|
| GAPDH | Homo sapiens | Forward: GGAGCGAGATCCCTCCAAAAT<br>Reverse: GGCTGTTGTCATACTTCTCATGG |
| CD24  | Homo sapiens | Forward: AGAGATAACCCTGCCCCGAGG<br>Reverse: CCCCCAAAAGAAAAGTCCGC    |
| SOX17 | Homo sapiens | Forward: CAAGGGCGAGTCCCGTATCC<br>Reverse: CGACTTGCCCAGCATCTTGC     |
| EPCAM | Homo sapiens | Forward: AGCGAGTGAGAACCTACTGGA<br>Reverse: CGCGTTGTGATCTCCTTCTGA   |
| WFDC2 | Homo sapiens | Forward: TGTTCCGGCTTACCCTAGTC<br>Reverse: TCCTTATCATTGGGCAGAGAGC   |
| INAVA | Homo sapiens | Forward: GCGGAGTATCCCCTCAAACC<br>Reverse: TTAGGGGGTCCTCTCTGTGC     |
| BNC1  | Homo sapiens | Forward: CAGCGGTCGCAGGATGG<br>Reverse: AGCTTACTTAGAGCGTGGGC        |
| AOX1  | Homo sapiens | Forward: TCATCTAAGGGTCTGGGAGAGT<br>Reverse: TCCAGGTTTCTCTCTCGGAA   |
| GSDME | Homo sapiens | Forward: CAGCTTACAGGGTGGGTGTC<br>Reverse: GCGCTATCTGGCATTCTGTC     |
| REEP1 | Homo sapiens | Forward: GATGGCTGCTTCCAAGGGAC<br>Reverse: TCTTAGGCTGGCCGTGTTTG     |
| HAND2 | Homo sapiens | Forward: GCCTCCTGGAAGAAGATCCA<br>Reverse: GCCAAGACACCCTGTAGAGC     |

The sequences of primers used for CD24, SOX17, WFDC2, EPCAM, INAVA, BNC1, AOX1, GSDME, REEP1, and HAND2 are listed in this table.
